# Supplementary material for: Cellulose-Based Films with Ultraviolet Shielding Performance Prepared Directly from Waste Corrugated Pulp
Source: MDPI journal article supplement (doi:10.3390/polym13193359), 2021-09-30
Supplement: s1 [file s1]

## Supplementary Information

Cellulose-based films with ultraviolet shielding performance prepared directly from waste corrugated pulp

*Guangmei Xia<sup>1,\*</sup>, Qiwen Zhou<sup>1</sup>, Zhen Xu<sup>1</sup>, Jinming Zhang<sup>2,\*</sup>, Xingxiang Ji<sup>1,\*</sup>, Jun Zhang<sup>2</sup>, Haq Nawaz<sup>2</sup>, Jie Wang<sup>1</sup> and Jianfeng Peng<sup>1</sup>*

1 State Key Laboratory of Biobased Material and Green Papermaking, Qilu University of Technology, Shandong Academy of Sciences, Jinan, 250353, Shandong, China; biliqwzhou@163.com (Q.Z.); xz521953@qlu.edu.cn(Z.X.); 2711544861@qq.com (J.W.); 1966614429@qq.com (J.P)

2 Beijing National Laboratory for Molecular Sciences, CAS Key Laboratory of Engineering Plastics, Institute of Chemistry, Chinese Academy of Sciences (CAS), Beijing, 100190, China; jzhang@iccas.ac.cn (J. Z.); haqnawaz@bjfu.edu.cn (H.N.)

\* Correspondence: gmxia@qlu.edu.cn (G.X.); zhjm@iccas.ac.cn (J.Z.); xxjt78@163.com (X.J.)

### C-film

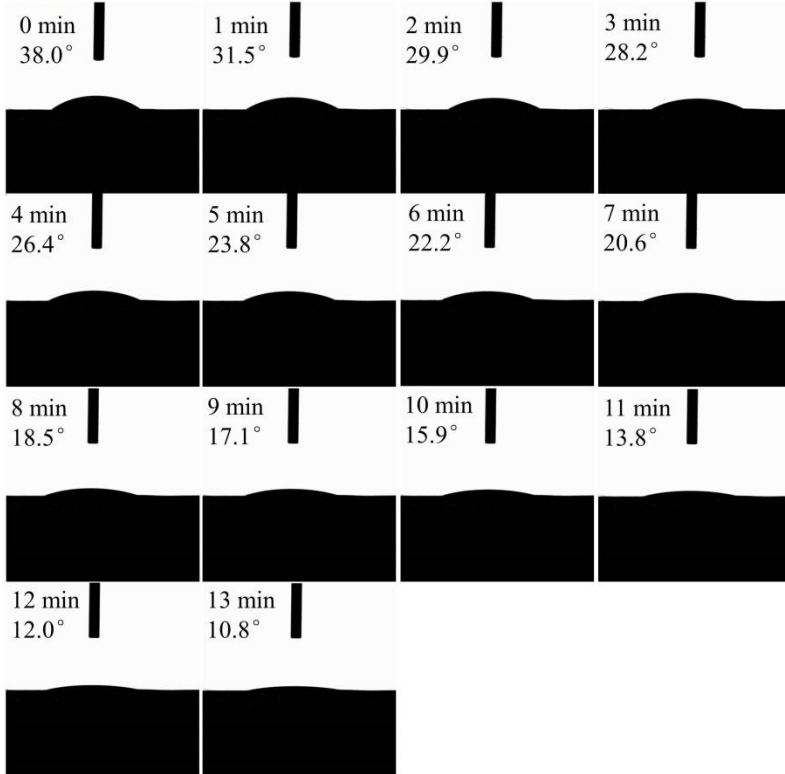

### Film-W

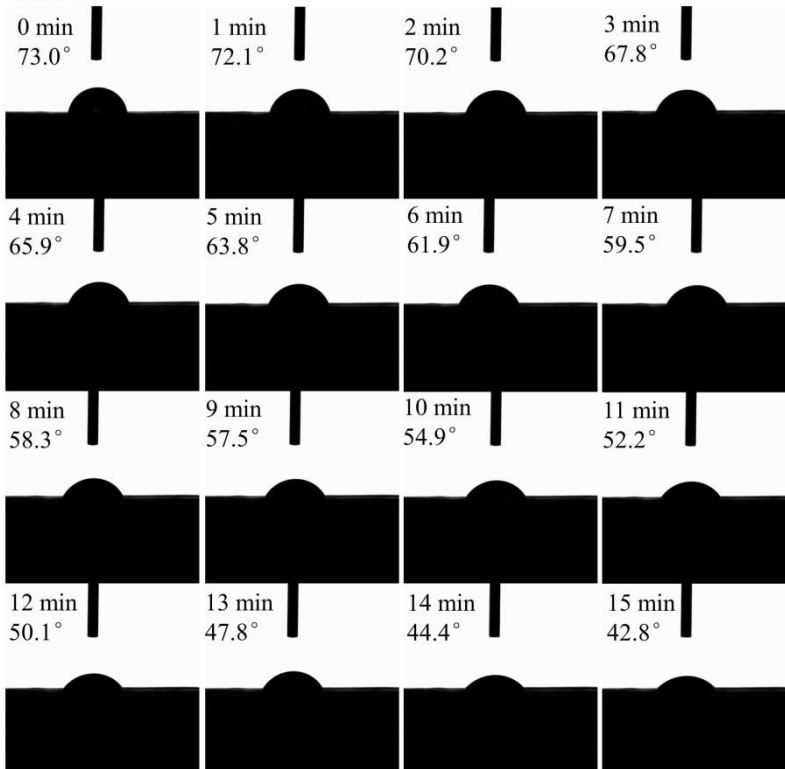

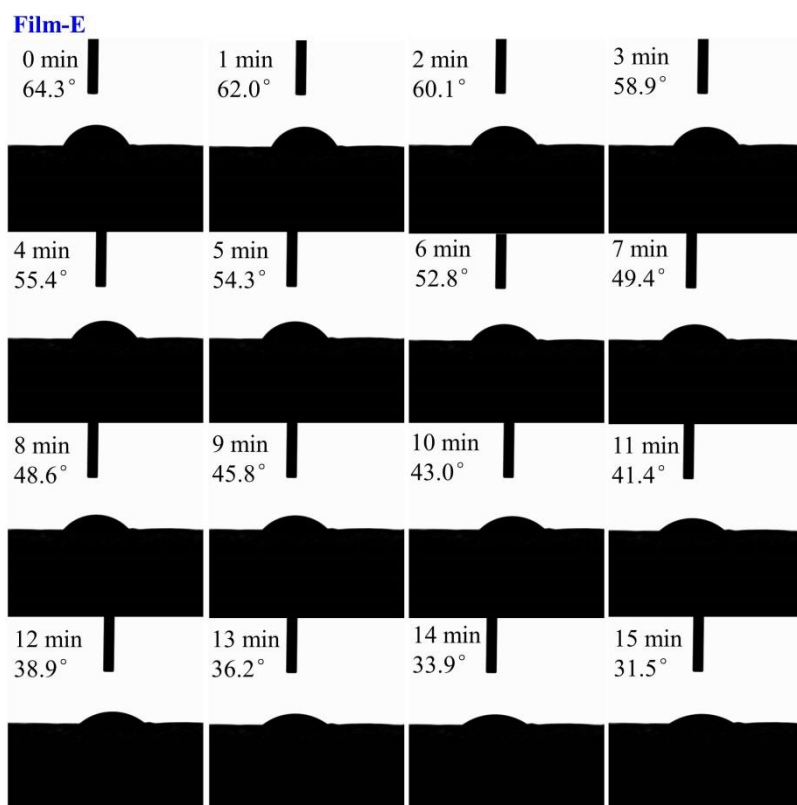

Fig. S1. Time-dependent evaluation of the contact angle of C-film, Film-W and Film-E.

Table S1. The surface roughness of C-film, Film-W and Film-E.

| Sample | Surface roughness<br>(Ra, $\mu\text{m}$ ) |
|--------|-------------------------------------------|
| C-film | $0.534 \pm 0.077$                         |
| Film-W | $1.874 \pm 0.099$                         |
| Film-E | $2.319 \pm 0.659$                         |

Note: Ra is the arithmetical mean roughness of the film surface recorded with Jitai RT200 roughness measuring instrument.

**C-film**

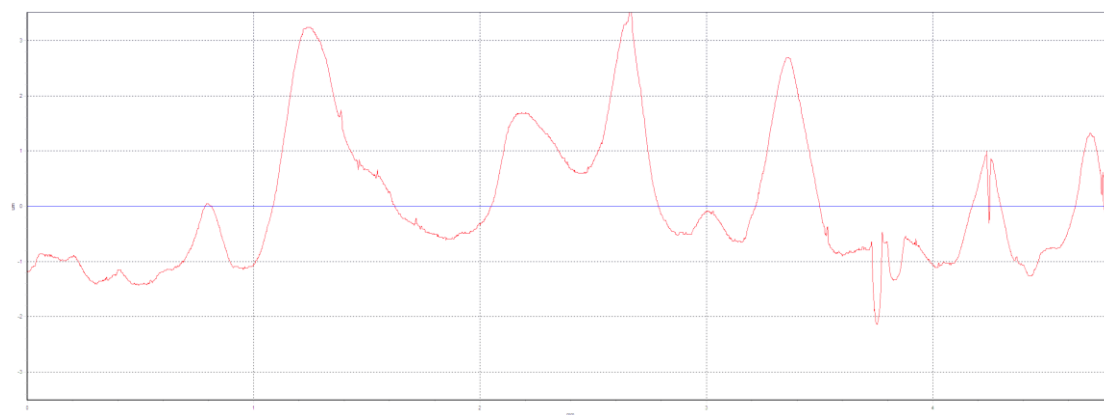

**Film-W**

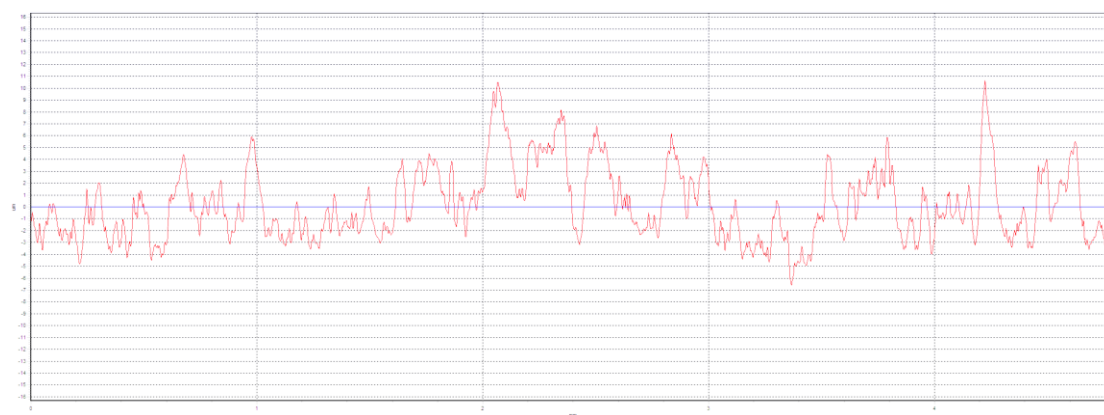

**Film-E**

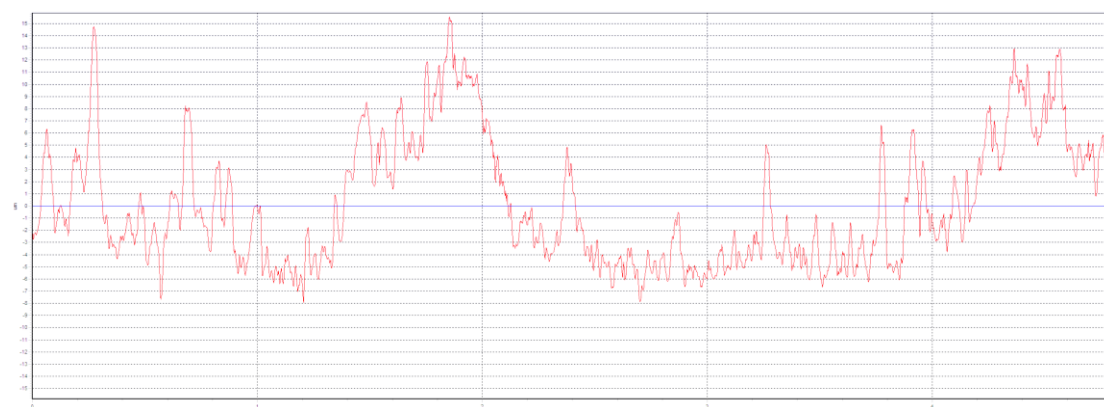

**Fig. S2. Surface profiles of C-film, Film-W and Film-E (sampling length=5.0 mm).**
